# Supplementary material
Source: publisher figshare collection journal article supplement (https://karger.figshare.com/articles/dataset/_/10260035)
Supplement: Supplementary file 1 [file 1]

## Supplementary materials

**Fig. S1. Sensitivity analysis of studies on the association between AD and total breastfeeding**

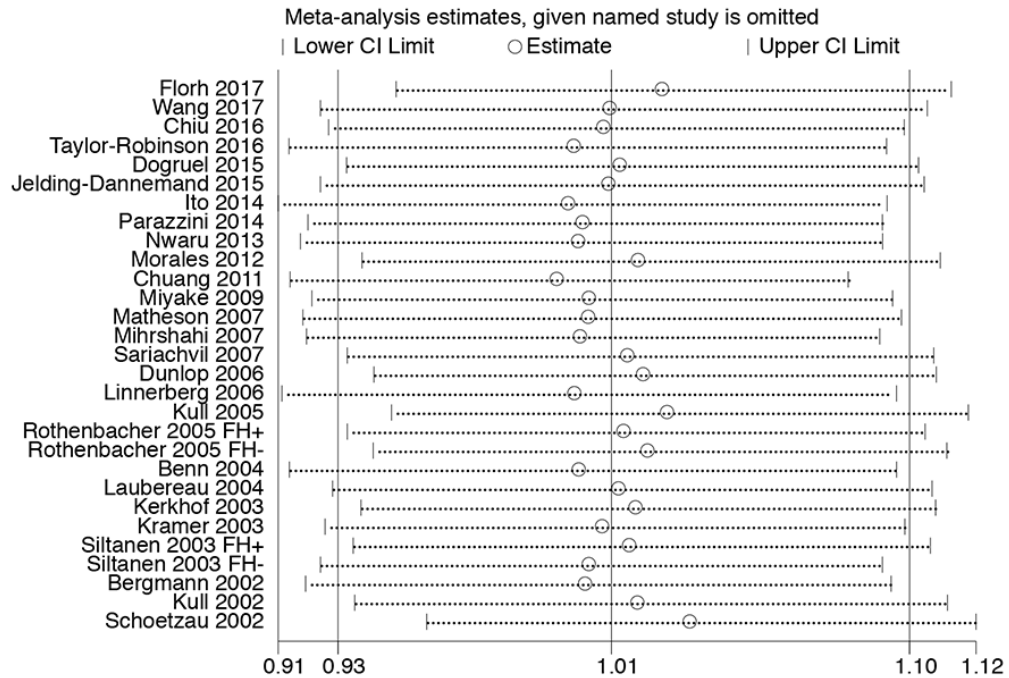

**Fig. S2. Sensitivity analysis of studies on the association between AD and exclusive breastfeeding**

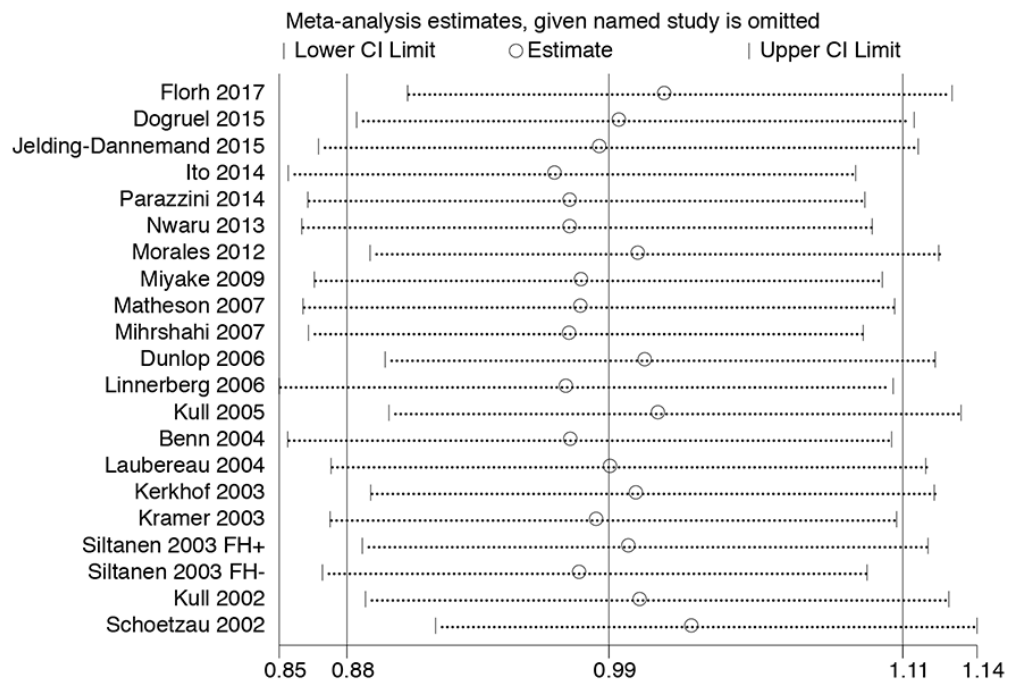

**Table S1. Newcastle-Ottawa quality assessment of the included studies**

| Study                  | Representativeness<br>of the exposed<br>cohort | Selection of the<br>non-exposed<br>cohort | Ascertainmen<br>t of exposure | Demonstration that<br>outcome of interest<br>was not present at<br>start of study | Comparability of<br>cohorts on the<br>basis of the<br>design or analysis | Assessment<br>of outcome | Was the follow-up<br>long enough for<br>outcome to occur | Adequacy of<br>follow up of<br>cohorts | Total |
|------------------------|------------------------------------------------|-------------------------------------------|-------------------------------|-----------------------------------------------------------------------------------|--------------------------------------------------------------------------|--------------------------|----------------------------------------------------------|----------------------------------------|-------|
| Flohr 2017             | 1                                              | 1                                         | 1                             | 1                                                                                 | 2                                                                        | 1                        | 1                                                        | 1                                      | 9     |
| Wang 2017              | 1                                              | 1                                         | 0                             | 1                                                                                 | 2                                                                        | 0                        | 1                                                        | 1                                      | 7     |
| Chiu 2016              | 1                                              | 1                                         | 1                             | 1                                                                                 | 2                                                                        | 1                        | 1                                                        | 0                                      | 8     |
| Taylor-Robinson 2016   | 1                                              | 1                                         | 1                             | 1                                                                                 | 2                                                                        | 1                        | 1                                                        | 1                                      | 9     |
| Doğruel 2015           | 1                                              | 1                                         | 1                             | 1                                                                                 | 2                                                                        | 1                        | 1                                                        | 1                                      | 9     |
| Jelding-Dannemand 2015 | 1                                              | 1                                         | 1                             | 1                                                                                 | 2                                                                        | 1                        | 1                                                        | 1                                      | 9     |
| Ito 2014               | 1                                              | 1                                         | 0                             | 1                                                                                 | 2                                                                        | 0                        | 1                                                        | 1                                      | 7     |
| Parazzini 2014         | 1                                              | 1                                         | 1                             | 1                                                                                 | 2                                                                        | 1                        | 1                                                        | 1                                      | 9     |
| Nwaru 2013             | 0                                              | 1                                         | 0                             | 0                                                                                 | 2                                                                        | 1                        | 1                                                        | 1                                      | 6     |
| Morales 2012           | 0                                              | 1                                         | 0                             | 1                                                                                 | 2                                                                        | 0                        | 1                                                        | 1                                      | 6     |
| Chuang 2011            | 1                                              | 1                                         | 0                             | 1                                                                                 | 2                                                                        | 1                        | 1                                                        | 1                                      | 8     |
| Miyake 2009            | 1                                              | 1                                         | 0                             | 1                                                                                 | 2                                                                        | 0                        | 1                                                        | 1                                      | 7     |
| Matheson 2007          | 1                                              | 1                                         | 0                             | 1                                                                                 | 2                                                                        | 0                        | 1                                                        | 1                                      | 7     |
| Mihrshahi 2007         | 1                                              | 1                                         | 1                             | 1                                                                                 | 2                                                                        | 1                        | 1                                                        | 1                                      | 9     |
| Sariachvil 2007        | 1                                              | 1                                         | 1                             | 1                                                                                 | 2                                                                        | 0                        | 1                                                        | 1                                      | 8     |
| Dunlop 2006            | 1                                              | 1                                         | 1                             | 1                                                                                 | 1                                                                        | 1                        | 1                                                        | 0                                      | 7     |
| Linnerberg 2006        | 1                                              | 1                                         | 0                             | 1                                                                                 | 2                                                                        | 0                        | 1                                                        | 1                                      | 7     |
| Kull 2005              | 1                                              | 1                                         | 1                             | 0                                                                                 | 1                                                                        | 1                        | 1                                                        | 1                                      | 7     |
| Rothenbacher 2005      | 1                                              | 1                                         | 1                             | 1                                                                                 | 2                                                                        | 0                        | 1                                                        | 1                                      | 8     |

|                |   |   |   |   |   |   |   |   |   |
|----------------|---|---|---|---|---|---|---|---|---|
| Benn 2004      | 1 | 1 | 0 | 1 | 2 | 1 | 1 | 1 | 8 |
| Laubereau 2004 | 1 | 1 | 1 | 1 | 2 | 1 | 1 | 1 | 9 |
| Kerkhof 2003   | 1 | 1 | 0 | 1 | 2 | 1 | 1 | 1 | 8 |
| Kramer 2003    | 1 | 1 | 1 | 1 | 2 | 1 | 1 | 1 | 9 |
| Siltanen 2003  | 1 | 1 | 0 | 1 | 2 | 0 | 1 | 1 | 7 |
| Bergmann 2002  | 1 | 1 | 0 | 1 | 2 | 1 | 1 | 1 | 8 |
| Kull 2002      | 1 | 1 | 0 | 1 | 2 | 1 | 1 | 1 | 8 |
| Schoetzau 2002 | 1 | 1 | 1 | 1 | 2 | 1 | 1 | 1 | 9 |

**Table S2. Comparison of Newcastle-Ottawa Scale (NOS) scores between our study and Lodge *et al.***

| Study           | Lin <i>et al.</i> | Lodge <i>et al.</i> <sup>1</sup> |
|-----------------|-------------------|----------------------------------|
| Parazzini 2014  | 9                 | 9                                |
| Nwaru 2013      | 6                 | 7                                |
| Morales 2012    | 6                 | 7                                |
| Chuang 2011     | 8                 | 9                                |
| Miyake 2009     | 7                 | 8                                |
| Matheson 2007   | 7                 | 6                                |
| Mihrshahi 2007  | 9                 | 9                                |
| Sariachvil 2007 | 8                 | 8                                |
| Dunlop 2006     | 7                 | 7                                |
| Linnerberg 2006 | 7                 | 6                                |
| Kull 2005       | 7                 | 7                                |
| Benn 2004       | 8                 | 8                                |
| Kerkhof 2003    | 8                 | 7                                |
| Kramer 2003     | 9                 | 8                                |
| Schoetzau 2002  | 9                 | 9                                |

Notes: no difference of NOS score is found between our study and Lodge *et al.* analyzed by Wilcoxon-Signed-Ranks test ( $p > 0.05$ )
